# Supplementary material
Source: PubMed Central journal article supplement (PMC9931840)
Supplement: 40265_2022_1822_MOESM1_ESM.pdf [file 40265_2022_1822_MOESM1_ESM.pdf]

**Supplementary appendix for the manuscript**

**Risk of COVID-19 diagnosis and hospitalization in patients with osteoarthritis or back pain treated with ibuprofen compared to other NSAIDs or paracetamol: a network cohort study**

AUTHORS: Junqing Xie<sup>1</sup>, James T Brash<sup>2</sup>, Cigdem Turkmen<sup>3</sup>, Stefan Driessen<sup>4</sup>, Giustino Varrassi<sup>5</sup>, George Argyriou<sup>2</sup>, Sarah Seager<sup>2</sup>, Christian Reich<sup>6</sup>, Dani Prieto-Alhambra<sup>1,7</sup>

**AFFILIATIONS:**

<sup>1</sup>Pharmaco- and Device Epidemiology, Centre for Statistics in Medicine - Nuffield Department of Orthopaedics, Rheumatology and Musculoskeletal Sciences, Botnar Research Centre, University of Oxford, Windmill Road, Oxford

<sup>2</sup>IQVIA, Real World Solutions, Brighton, UK

<sup>3</sup>Established Pharmaceuticals Division, Global Medical Affairs, Abbott Products Operations AG, Allschwil, Switzerland

<sup>4</sup>Established Pharmaceuticals Division, Global Biometrics, Abbott Healthcare Products B.V, Weesp, The Netherlands

<sup>5</sup>Paolo Procacci Foundation, Department of Research, 00193 Roma, Italy

<sup>6</sup>IQVIA, Real World Solutions, 201 Broadway, Cambridge MA, USA

<sup>7</sup>Medical Informatics, Erasmus Medical Center University, Rotterdam, Netherlands

**CORRESPONDENCE:**

Prof Daniel Prieto-Alhambra

Botnar Research Centre, Windmill Road, OX37LD, Oxford, UK

**Annex 1. Database information**

- IQVIA Open Claims collected from office-based physicians and specialists covering over 300 million people (~80% of the US population)
- IQVIA PharMetrics Plus comprises adjudicated claims for more than 150 million unique commercially insured enrollees across the US

## Annex 2. Concept IDs

The tables in this annex contain the concept codes used in this study. You can find more details regarding these codes in the Athena website (<https://athena.ohdsi.org/search-terms/terms>) hosted by OHDSI.

**Supplementary table 1. Concepts related to osteoarthritis and back pain**

| Concept Id | Concept Name   | Domain    | Vocabulary | Descendants |
|------------|----------------|-----------|------------|-------------|
| 80180      | Osteoarthritis | Condition | SNOMED     | YES         |
| 36516951   | Back pain      | Condition | MedDRA     | YES         |

**Supplementary table 2. Concepts related to ibuprofen**

| Concept Id | Concept Name | Domain | Vocabulary | Descendants |
|------------|--------------|--------|------------|-------------|
| 1177480    | Ibuprofen    | Drug   | RxNorm     | YES         |

**Supplementary table 3. Concepts related to ns-NSAIDs**

| Concept ID | Concept Name    | Domain | Vocabulary | Descendants |
|------------|-----------------|--------|------------|-------------|
| 1139179    | bromfenac       | Drug   | RxNorm     | Yes         |
| 1124300    | diclofenac      | Drug   | RxNorm     | Yes         |
| 1195492    | etodolac        | Drug   | RxNorm     | Yes         |
| 1153928    | fenoprofen      | Drug   | RxNorm     | Yes         |
| 1156378    | flurbiprofen    | Drug   | RxNorm     | Yes         |
| 1178663    | indomethacin    | Drug   | RxNorm     | Yes         |
| 1185922    | ketoprofen      | Drug   | RxNorm     | Yes         |
| 1136980    | ketorolac       | Drug   | RxNorm     | Yes         |
| 1180182    | meclofenamate   | Drug   | RxNorm     | Yes         |
| 1197736    | mefenamate      | Drug   | RxNorm     | Yes         |
| 1150345    | meloxicam       | Drug   | RxNorm     | Yes         |
| 1113648    | nabumetone      | Drug   | RxNorm     | Yes         |
| 1115008    | naproxen        | Drug   | RxNorm     | Yes         |
| 1118045    | oxaprozin       | Drug   | RxNorm     | Yes         |
| 19025925   | oxyphenbutazone | Drug   | RxNorm     | Yes         |
| 1135710    | phenylbutazone  | Drug   | RxNorm     | Yes         |
| 1146810    | piroxicam       | Drug   | RxNorm     | Yes         |
| 1236607    | sulindac        | Drug   | RxNorm     | Yes         |
| 1102917    | tolmetin        | Drug   | RxNorm     | Yes         |

**Supplementary table 4. Concepts related to COX-2 inhibitors**

| Concept Id | Concept Name | Domain | Vocabulary | Descendants |
|------------|--------------|--------|------------|-------------|
| 21603991   | Coxibs       | Drug   | ATC        | YES         |

**Supplementary table 5. Concepts related to paracetamol (acetaminophen)**

| Concept Id | Concept Name  | Domain | Vocabulary | Descendants |
|------------|---------------|--------|------------|-------------|
| 1125315    | acetaminophen | Drug   | RxNorm     | YES         |

**Supplementary table 6. Concepts related to COVID-19 conditions**

| <b>Concept Id</b> | <b>Concept Name</b>                   | <b>Domain</b> | <b>Vocabulary</b> | <b>Descendants</b> |
|-------------------|---------------------------------------|---------------|-------------------|--------------------|
| 439676            | Coronavirus infection                 | Condition     | SNOMED            | YES                |
| 4100065           | Disease due to Coronaviridae          | Condition     | SNOMED            | YES                |
| 37311060          | Suspected disease caused by 2019-nCoV | Observation   | SNOMED            | YES                |
| 37311061          | Disease caused by 2019-nCoV           | Condition     | SNOMED            | YES                |

**Supplementary table 7. Concepts related to SARS-COV-2 positive test; pre-coordinated**

| <b>Concept Id</b> | <b>Concept Name</b>             | <b>Domain</b> | <b>Vocabulary</b> | <b>Descendants</b> |
|-------------------|---------------------------------|---------------|-------------------|--------------------|
| 37310282          | 2019 novel coronavirus detected | Measurement   | SNOMED            | YES                |

**Supplementary table 8. Concepts related to SARS-CoV-2 positive test**

| <b>Concept Id</b> | <b>Concept Name</b>                                                         | <b>Domain</b>     | <b>Vocabulary</b> | <b>Descendants</b> |
|-------------------|-----------------------------------------------------------------------------|-------------------|-------------------|--------------------|
| 756055            | Measurement of Severe acute respiratory syndrome coronavirus 2 (SARS-CoV-2) | Measurement       | OMOP Extension    | YES                |
| 4126681           | Detected                                                                    | Measurement value | SNOMED            | NO                 |
| 45877985          | Detected                                                                    | Measurement value | LOINC             | NO                 |
| 4181412           | Present                                                                     | Measurement value | SNOMED            | NO                 |
| 45879438          | Present                                                                     | Measurement value | LOINC             | NO                 |
| 9191              | Positive                                                                    | Measurement value | SNOMED            | NO                 |
| 45884084          | Positive                                                                    | Measurement value | LOINC             | NO                 |

**Supplementary table 9. Inpatient visit**

| <b>Concept Id</b> | <b>Concept Name</b>                | <b>Domain</b> | <b>Vocabulary</b> | <b>Descendants</b> |
|-------------------|------------------------------------|---------------|-------------------|--------------------|
| 262               | Emergency Room and Inpatient Visit | Visit         | Visit             | YES                |
| 9201              | Inpatient Visit                    | Visit         | Visit             | YES                |

**Supplementary table 10. Concept sets related to negative control outcomes**

| <b>Concept ID</b> | <b>Concept Name</b>                                   | <b>Domain</b> | <b>Vocabulary</b> | <b>Descendants</b> |
|-------------------|-------------------------------------------------------|---------------|-------------------|--------------------|
| 435574            | Abnormal form of root of tooth                        | Condition     | SNOMED            | YES                |
| 4262562           | Abnormal heart beat                                   | Condition     | SNOMED            | YES                |
| 436409            | Abnormal pupil                                        | Condition     | SNOMED            | YES                |
| 378256            | Abnormal reflex                                       | Condition     | SNOMED            | YES                |
| 137989            | Abnormal results of cardiovascular function studies   | Condition     | SNOMED            | YES                |
| 4088290           | Absence of breast                                     | Condition     | SNOMED            | YES                |
| 4092879           | Absent kidney                                         | Condition     | SNOMED            | YES                |
| 4088768           | Absent nipple                                         | Condition     | SNOMED            | YES                |
| 435720            | Adverse anesthesia outcome                            | Condition     | SNOMED            | YES                |
| 433753            | Alcohol abuse                                         | Condition     | SNOMED            | YES                |
| 4303805           | Allergic reaction to bite and/or sting                | Condition     | SNOMED            | YES                |
| 434916            | Amphetamine or psychostimulant dependence, continuous | Condition     | SNOMED            | YES                |
| 4198962           | Amputated thumb                                       | Condition     | SNOMED            | YES                |
| 4103642           | Amputated toe                                         | Condition     | SNOMED            | YES                |
| 4060259           | Antenatal amniocentesis - abnormal                    | Condition     | SNOMED            | YES                |
| 4061157           | Antenatal ultrasound scan abnormal                    | Condition     | SNOMED            | YES                |
| 321689            | Apnea                                                 | Condition     | SNOMED            | YES                |
| 443563            | Arteriosclerosis of coronary artery bypass graft      | Condition     | SNOMED            | YES                |
| 4151169           | Baby birth weight less than 751gm                     | Condition     | SNOMED            | YES                |
| 4114976           | Balanced rearrangement and structural marker          | Condition     | SNOMED            | YES                |
| 78200             | Benign mammary dysplasia                              | Condition     | SNOMED            | YES                |
| 4216219           | Bizarre personal appearance                           | Condition     | SNOMED            | YES                |
| 4195873           | Breath smells unpleasant                              | Condition     | SNOMED            | YES                |
| 74698             | Breech presentation                                   | Condition     | SNOMED            | YES                |
| 134765            | Cachexia                                              | Condition     | SNOMED            | YES                |
| 443792            | Calculus of bile duct                                 | Condition     | SNOMED            | YES                |
| 434327            | Cannabis abuse                                        | Condition     | SNOMED            | YES                |
| 4228429           | Carnitine deficiency                                  | Condition     | SNOMED            | YES                |
| 4213540           | Cervical somatic dysfunction                          | Condition     | SNOMED            | YES                |
| 444064            | Cholesteatoma of middle ear and mastoid structure     | Condition     | SNOMED            | YES                |
| 197318            | Cholesterolosis of gallbladder                        | Condition     | SNOMED            | YES                |
| 432303            | Cocaine abuse                                         | Condition     | SNOMED            | YES                |
| 196454            | Colostomy and enterostomy malfunction                 | Condition     | SNOMED            | YES                |
| 4201390           | Colostomy present                                     | Condition     | SNOMED            | YES                |
| 439125            | Complete trisomy 21 syndrome                          | Condition     | SNOMED            | YES                |
| 46269889          | Complication due to Crohn's disease                   | Condition     | SNOMED            | YES                |
| 434675            | Complication of gastrostomy                           | Condition     | SNOMED            | YES                |
| 438624            | Complication of renal dialysis                        | Condition     | SNOMED            | YES                |

|          |                                                                      |           |        |     |
|----------|----------------------------------------------------------------------|-----------|--------|-----|
| 4309151  | Complications of attempted introduction of embryo in embryo transfer | Condition | SNOMED | YES |
| 373204   | Conjunctival xerosis                                                 | Condition | SNOMED | YES |
| 4022071  | Convalescence                                                        | Condition | SNOMED | YES |
| 433270   | Cord entanglement without compression                                | Condition | SNOMED | YES |
| 380724   | Corneal ghost vessels                                                | Condition | SNOMED | YES |
| 4311591  | Cramp in limb                                                        | Condition | SNOMED | YES |
| 441267   | Cystic fibrosis                                                      | Condition | SNOMED | YES |
| 40486120 | Delay in physiological development                                   | Condition | SNOMED | YES |
| 436233   | Delayed milestone                                                    | Condition | SNOMED | YES |
| 438183   | Denture occlusion incorrect                                          | Condition | SNOMED | YES |
| 438759   | Descemet's membrane fold                                             | Condition | SNOMED | YES |
| 4096201  | Dietary calcium deficiency                                           | Condition | SNOMED | YES |
| 4101282  | Dietary selenium deficiency                                          | Condition | SNOMED | YES |
| 4101283  | Dietary zinc deficiency                                              | Condition | SNOMED | YES |
| 4115402  | Difficulty sleeping                                                  | Condition | SNOMED | YES |
| 4019971  | Discord in school                                                    | Condition | SNOMED | YES |
| 4022078  | Discord with counselor                                               | Condition | SNOMED | YES |
| 201091   | Disproportion - major pelvic abnormality                             | Condition | SNOMED | YES |
| 372329   | Dissociated deviation                                                | Condition | SNOMED | YES |
| 4155818  | Does climb                                                           | Condition | SNOMED | YES |
| 433111   | Effects of hunger                                                    | Condition | SNOMED | YES |
| 439791   | Emotional upset                                                      | Condition | SNOMED | YES |
| 4029271  | Essential fatty acid deficiency                                      | Condition | SNOMED | YES |
| 437448   | Exhaustion due to excessive exertion                                 | Condition | SNOMED | YES |
| 45757488 | Eye and vision examination normal                                    | Condition | SNOMED | YES |
| 4059015  | Falls                                                                | Condition | SNOMED | YES |
| 4083100  | Fasciitis with eosinophilia syndrome                                 | Condition | SNOMED | YES |
| 4182437  | Female genital cutting                                               | Condition | SNOMED | YES |
| 4262519  | Female sexual arousal disorder                                       | Condition | SNOMED | YES |
| 4118057  | Fetal or neonatal effect of maternal oligohydramnios                 | Condition | SNOMED | YES |
| 4229403  | Flat anterior chamber of eye                                         | Condition | SNOMED | YES |
| 4264617  | Foot-drop                                                            | Condition | SNOMED | YES |
| 374801   | Foreign body in ear                                                  | Condition | SNOMED | YES |
| 259995   | Foreign body in orifice                                              | Condition | SNOMED | YES |
| 4096540  | Foreskin deficient                                                   | Condition | SNOMED | YES |
| 4215117  | Fructose metabolism disorder                                         | Condition | SNOMED | YES |
| 73564    | Full thickness rotator cuff tear                                     | Condition | SNOMED | YES |
| 439788   | Galactosemia                                                         | Condition | SNOMED | YES |
| 196456   | Gallstone                                                            | Condition | SNOMED | YES |
| 4166231  | Genetic predisposition                                               | Condition | SNOMED | YES |
| 437202   | Giardiasis                                                           | Condition | SNOMED | YES |
| 434164   | Glycosuria                                                           | Condition | SNOMED | YES |

|          |                                                                              |           |        |     |
|----------|------------------------------------------------------------------------------|-----------|--------|-----|
| 4101199  | Hearing problem                                                              | Condition | SNOMED | YES |
| 440532   | Heavy-for-dates at birth regardless of gestation period                      | Condition | SNOMED | YES |
| 4163735  | Hemochromatosis                                                              | Condition | SNOMED | YES |
| 440329   | Herpes zoster without complication                                           | Condition | SNOMED | YES |
| 195212   | Hypercortisolism                                                             | Condition | SNOMED | YES |
| 4284559  | Hypermagnesemia                                                              | Condition | SNOMED | YES |
| 133729   | Hyperparathyroidism                                                          | Condition | SNOMED | YES |
| 4287416  | Hyperphenylalaninemia                                                        | Condition | SNOMED | YES |
| 4058388  | Hypertrophic scar                                                            | Condition | SNOMED | YES |
| 4098611  | Hyperuricemia without signs of inflammatory arthritis and tophaceous disease | Condition | SNOMED | YES |
| 435522   | Hypervitaminosis D                                                           | Condition | SNOMED | YES |
| 443236   | Hypnotic or anxiolytic dependence                                            | Condition | SNOMED | YES |
| 440072   | Hypogammaglobulinemia                                                        | Condition | SNOMED | YES |
| 4098604  | Hypomagnesemia                                                               | Condition | SNOMED | YES |
| 435515   | Hypo-osmolality and or hyponatremia                                          | Condition | SNOMED | YES |
| 40481585 | Hypoplasia of maxillary bone                                                 | Condition | SNOMED | YES |
| 435371   | Hypothermia                                                                  | Condition | SNOMED | YES |
| 437390   | Hypoxemia                                                                    | Condition | SNOMED | YES |
| 443447   | Iatrogenic hypotension                                                       | Condition | SNOMED | YES |
| 4223399  | Iliac crest spur                                                             | Condition | SNOMED | YES |
| 433605   | Ill-defined disease                                                          | Condition | SNOMED | YES |
| 432596   | Immune defect                                                                | Condition | SNOMED | YES |
| 374375   | Impacted cerumen                                                             | Condition | SNOMED | YES |
| 4311629  | Impaired glucose tolerance                                                   | Condition | SNOMED | YES |
| 4344500  | Impingement syndrome of shoulder region                                      | Condition | SNOMED | YES |
| 193020   | Incomplete emptying of bladder                                               | Condition | SNOMED | YES |
| 441417   | Incoordination                                                               | Condition | SNOMED | YES |
| 434485   | Increase in body fat                                                         | Condition | SNOMED | YES |
| 4168222  | Intra-abdominal and pelvic swelling, mass and lump                           | Condition | SNOMED | YES |
| 440710   | Intraretinal microvascular abnormality                                       | Condition | SNOMED | YES |
| 196168   | Irregular periods                                                            | Condition | SNOMED | YES |
| 4168681  | Irritability and anger                                                       | Condition | SNOMED | YES |
| 434063   | Jaw to cranial base anomaly                                                  | Condition | SNOMED | YES |
| 72404    | Joint stiffness                                                              | Condition | SNOMED | YES |
| 432593   | Kwashiorkor                                                                  | Condition | SNOMED | YES |
| 437078   | Large head                                                                   | Condition | SNOMED | YES |
| 133088   | Late amputation stump complication                                           | Condition | SNOMED | YES |
| 440382   | Learning difficulties                                                        | Condition | SNOMED | YES |
| 436041   | Leech infestation                                                            | Condition | SNOMED | YES |
| 4228331  | Leukokeratosis nicotina palati                                               | Condition | SNOMED | YES |
| 195873   | Leukorrhea                                                                   | Condition | SNOMED | YES |
| 377873   | Lid lag                                                                      | Condition | SNOMED | YES |

|          |                                                                             |           |        |     |
|----------|-----------------------------------------------------------------------------|-----------|--------|-----|
| 435516   | Lipoprotein deficiency disorder                                             | Condition | SNOMED | YES |
| 4210746  | Localized amyloidosis                                                       | Condition | SNOMED | YES |
| 433997   | Lymphangioma                                                                | Condition | SNOMED | YES |
| 4083487  | Macular drusen                                                              | Condition | SNOMED | YES |
| 4051630  | Malingering                                                                 | Condition | SNOMED | YES |
| 436426   | Malleus mobility reduced                                                    | Condition | SNOMED | YES |
| 438808   | Mammary duct ectasia                                                        | Condition | SNOMED | YES |
| 432798   | Mechanical complication of internal orthopedic device, implant AND/OR graft | Condition | SNOMED | YES |
| 439082   | Menopausal syndrome                                                         | Condition | SNOMED | YES |
| 45757258 | Minimal keratinized residual ridge mucosa                                   | Condition | SNOMED | YES |
| 441536   | Mixed acid-base balance disorder                                            | Condition | SNOMED | YES |
| 4298207  | Mouth breathing                                                             | Condition | SNOMED | YES |
| 4009035  | Multifocal fibrosclerosis                                                   | Condition | SNOMED | YES |
| 134315   | Myelophthisis                                                               | Condition | SNOMED | YES |
| 441553   | Myoclonus                                                                   | Condition | SNOMED | YES |
| 375077   | Neglect of one side of body                                                 | Condition | SNOMED | YES |
| 4119307  | Neurogenic claudication                                                     | Condition | SNOMED | YES |
| 4209423  | Nicotine dependence                                                         | Condition | SNOMED | YES |
| 40304526 | Nocturia                                                                    | Condition | SNOMED | YES |
| 4035269  | Non-ketotic hyperglycinemia                                                 | Condition | SNOMED | YES |
| 439907   | Non-traumatic tendon rupture                                                | Condition | SNOMED | YES |
| 45770922 | Open anterior occlusal relationship                                         | Condition | SNOMED | YES |
| 44789003 | Open wound of thumb with damage to nail                                     | Condition | SNOMED | YES |
| 438130   | Opioid abuse                                                                | Condition | SNOMED | YES |
| 437359   | Osteochondritis dissecans                                                   | Condition | SNOMED | YES |
| 313601   | Oxygen supply absent                                                        | Condition | SNOMED | YES |
| 44782778 | Pain disorder with psychological factor                                     | Condition | SNOMED | YES |
| 4091513  | Passing flatus                                                              | Condition | SNOMED | YES |
| 4022076  | Patient dependence on care provider                                         | Condition | SNOMED | YES |
| 443788   | Peritoneal adhesions with obstruction                                       | Condition | SNOMED | YES |
| 437092   | Physiological development failure                                           | Condition | SNOMED | YES |
| 22856    | Polyglandular dysfunction                                                   | Condition | SNOMED | YES |
| 437369   | Postmature infancy                                                          | Condition | SNOMED | YES |
| 4094448  | Pregnancy test negative                                                     | Condition | SNOMED | YES |
| 4114585  | Primary gonarthrosis, bilateral                                             | Condition | SNOMED | YES |
| 4080568  | Problem behavior                                                            | Condition | SNOMED | YES |
| 46286594 | Problem related to lifestyle                                                | Condition | SNOMED | YES |
| 199876   | Prolapse of female genital organs                                           | Condition | SNOMED | YES |
| 439790   | Psychalgia                                                                  | Condition | SNOMED | YES |
| 4049367  | Psychologic conversion disorder                                             | Condition | SNOMED | YES |
| 440068   | Psychosexual dysfunction                                                    | Condition | SNOMED | YES |
| 4245252  | Raised prostate specific antigen                                            | Condition | SNOMED | YES |
| 436246   | Reduced libido                                                              | Condition | SNOMED | YES |



|          |                                                    |           |        |     |
|----------|----------------------------------------------------|-----------|--------|-----|
| 73754    | Restless legs                                      | Condition | SNOMED | YES |
| 4168212  | Restlessness and agitation                         | Condition | SNOMED | YES |
| 45772079 | Retinopathy of prematurity stage 0                 | Condition | SNOMED | YES |
| 4013540  | RhD negative                                       | Condition | SNOMED | YES |
| 444372   | Rupture of tendon of biceps, long head             | Condition | SNOMED | YES |
| 436828   | Saliva abnormal                                    | Condition | SNOMED | YES |
| 138821   | Seborrhea                                          | Condition | SNOMED | YES |
| 4068847  | Segmental and somatic dysfunction                  | Condition | SNOMED | YES |
| 435088   | Senility                                           | Condition | SNOMED | YES |
| 4049121  | Separated epiphysis                                | Condition | SNOMED | YES |
| 4052226  | Sequelae of injuries of lower limb                 | Condition | SNOMED | YES |
| 4198492  | Shoulder joint unstable                            | Condition | SNOMED | YES |
| 25518    | Sickle cell trait                                  | Condition | SNOMED | YES |
| 137682   | Skin sensation disturbance                         | Condition | SNOMED | YES |
| 4305303  | Sleep deprivation                                  | Condition | SNOMED | YES |
| 4125590  | Slurred speech                                     | Condition | SNOMED | YES |
| 4176908  | Snapping thumb syndrome                            | Condition | SNOMED | YES |
| 4248728  | Snoring                                            | Condition | SNOMED | YES |
| 4019836  | Social exclusion                                   | Condition | SNOMED | YES |
| 36713918 | Somatic dysfunction of lumbar region               | Condition | SNOMED | YES |
| 444127   | Specimen satisfactory for evaluation but limited   | Condition | SNOMED | YES |
| 4079874  | Sphingolipidosis                                   | Condition | SNOMED | YES |
| 200527   | Splenomegaly                                       | Condition | SNOMED | YES |
| 443172   | Splinter of face, without major open wound         | Condition | SNOMED | YES |
| 138278   | Sprains and strains of joints and adjacent muscles | Condition | SNOMED | YES |
| 443082   | Starvation                                         | Condition | SNOMED | YES |
| 4008710  | Stenosis due to any device, implant AND/OR graft   | Condition | SNOMED | YES |
| 40479573 | Stimulant abuse                                    | Condition | SNOMED | YES |
| 40483172 | Stimulant dependence                               | Condition | SNOMED | YES |
| 440233   | Strain of supraspinatus muscle AND/OR tendon       | Condition | SNOMED | YES |
| 72415    | Synovial plica                                     | Condition | SNOMED | YES |
| 4194160  | Thyroid function tests abnormal                    | Condition | SNOMED | YES |
| 77081    | Tibialis tendinitis                                | Condition | SNOMED | YES |
| 4201387  | Tracheostomy present                               | Condition | SNOMED | YES |
| 4309320  | Transplanted organ rejection                       | Condition | SNOMED | YES |
| 4029731  | Trimethylaminuria                                  | Condition | SNOMED | YES |
| 40482801 | Type II diabetes mellitus uncontrolled             | Condition | SNOMED | YES |
| 4101289  | Tyrosinemia                                        | Condition | SNOMED | YES |
| 4199550  | Unable to mobilize                                 | Condition | SNOMED | YES |
| 4092743  | Unsteady when standing                             | Condition | SNOMED | YES |
| 196821   | Urethral discharge                                 | Condition | SNOMED | YES |
| 4216708  | Urgent desire for stool                            | Condition | SNOMED | YES |

|         |                       |           |        |     |
|---------|-----------------------|-----------|--------|-----|
| 442282  | Urinary casts         | Condition | SNOMED | YES |
| 79873   | Urolith               | Condition | SNOMED | YES |
| 4088910 | Uterine cervix absent | Condition | SNOMED | YES |
| 4088920 | Uterus absent         | Condition | SNOMED | YES |
| 4275889 | Visual hallucinations | Condition | SNOMED | YES |
| 4104132 | Vomit contains feces  | Condition | SNOMED | YES |
| 439405  | Walking disability    | Condition | SNOMED | YES |
| 4193634 | Worried               | Condition | SNOMED | YES |
| 435723  | Wound seroma          | Condition | SNOMED | YES |
| 440193  | Wristdrop             | Condition | SNOMED | YES |

### **Annex 3. Propensity score model and balance**

To build large-scale PS models, we systematically engineered and extracted a large, consistent set of baseline patient characteristics that included:

- Demographics (age in 5-year bands, gender, index month)
- Conditions (condition occurrence in lookback window, SNOMED level)
  - Any time prior to index date
  - 180 days prior to index date
  - 30 days prior to index date
- Drugs (drug exposure in lookback window; RxNorm ingredient level)
  - Any time prior to index date
  - 180 days prior to index date
  - 30 days prior to index date
- Procedures (procedure occurrence in lookback window)
  - Any time prior to index date
  - 180 days prior to index date
  - 30 days prior to index date
- Devices (device exposure in lookback window)
  - Any time prior to index date
  - 180 days prior to index date
  - 30 days prior to index date
- Measurement (measurement occurrence in lookback window)
  - Any time prior to index date
  - 180 days prior to index date
  - 30 days prior to index date
- Measurement values
  - 180 days prior to index date
- Clinical index scores
  - CHA<sub>2</sub>DS<sub>2</sub>VASc
  - Diabetes Complications Severity Index (DCSI)
  - Charlson comorbidity index – Romano adaption

#### Annex 4. Complete data and results for Ibuprofen comparisons

Supplementary table 11. Incidence of COVID-19 diagnosis in PS-matched Ibuprofen and comparator cohorts

| Comparisons                               | Database         | Persons each Cohort <sup>1</sup> | Cases  |        | Follow up (years) |         | Incidence (%) |      | Incidence (per 1k person years) |      |  |
|-------------------------------------------|------------------|----------------------------------|--------|--------|-------------------|---------|---------------|------|---------------------------------|------|--|
|                                           |                  |                                  | Ibu    | Comp   | Ibu               | Comp    | Ibu           | Comp | Ibu                             | Comp |  |
| <b>On treatment (Nov 2019- Jan 2020)</b>  |                  |                                  |        |        |                   |         |               |      |                                 |      |  |
| Ibuprofen vs COX-2i                       | PharMetrics Plus | 39,572                           | 156    | 480    | 6,931             | 14,539  | 0.39          | 1.21 | 22.5                            | 33.0 |  |
| Ibuprofen vs COX-2i                       | OpenClaims       | 272,097                          | 1,407  | 3,432  | 62,849            | 138,466 | 0.52          | 1.26 | 22.4                            | 24.8 |  |
| Ibuprofen vs ns-NSAIDs                    | PharMetrics Plus | 69,723                           | 174    | 449    | 9,038             | 16,081  | 0.25          | 0.64 | 19.3                            | 27.9 |  |
| Ibuprofen vs ns-NSAIDs                    | OpenClaims       | 563,839                          | 1,885  | 4,100  | 98,946            | 168,055 | 0.33          | 0.73 | 19.1                            | 24.4 |  |
| Ibuprofen vs Paracetamol                  | PharMetrics Plus | 54,074                           | 119    | 414    | 6,830             | 10,454  | 0.22          | 0.77 | 17.4                            | 39.6 |  |
| Ibuprofen vs Paracetamol                  | OpenClaims       | 437,928                          | 1,334  | 4,523  | 71,973            | 141,905 | 0.30          | 1.03 | 18.5                            | 31.9 |  |
| <b>On treatment (Feb 2020 - Oct 2020)</b> |                  |                                  |        |        |                   |         |               |      |                                 |      |  |
| Ibuprofen vs COX-2i                       | PharMetrics Plus | 67,190                           | 532    | 1,247  | 10,894            | 21,898  | 0.79          | 1.86 | 48.8                            | 57.0 |  |
| Ibuprofen vs COX-2i                       | OpenClaims       | 457,280                          | 3,551  | 7,370  | 92,004            | 193,931 | 0.78          | 1.61 | 38.6                            | 38.0 |  |
| Ibuprofen vs ns-NSAIDs                    | PharMetrics Plus | 120,954                          | 689    | 1,334  | 14,424            | 24,796  | 0.57          | 1.10 | 47.8                            | 53.8 |  |
| Ibuprofen vs ns-NSAIDs                    | OpenClaims       | 943,006                          | 5,382  | 9,682  | 143,309           | 241,999 | 0.57          | 1.03 | 37.6                            | 40.0 |  |
| Ibuprofen vs Paracetamol                  | PharMetrics Plus | 101,635                          | 575    | 834    | 11,617            | 15,820  | 0.57          | 0.82 | 49.5                            | 52.7 |  |
| Ibuprofen vs Paracetamol                  | OpenClaims       | 776,963                          | 4,325  | 8,106  | 110,110           | 188,659 | 0.56          | 1.04 | 39.3                            | 43.0 |  |
| <b>ITT 6 months (Nov 2019- Jan 2020)</b>  |                  |                                  |        |        |                   |         |               |      |                                 |      |  |
| Ibuprofen vs COX-2i                       | PharMetrics Plus | 40,040                           | 240    | 206    | 17,926            | 17,863  | 0.60          | 0.51 | 13.4                            | 11.5 |  |
| Ibuprofen vs COX-2i                       | OpenClaims       | 276,702                          | 2,102  | 1,796  | 134,908           | 135,196 | 0.76          | 0.65 | 15.6                            | 13.3 |  |
| Ibuprofen vs ns-NSAIDs                    | PharMetrics Plus | 76,940                           | 502    | 471    | 34,390            | 34,220  | 0.65          | 0.61 | 14.6                            | 13.8 |  |
| Ibuprofen vs ns-NSAIDs                    | OpenClaims       | 598,264                          | 5,192  | 5,241  | 289,125           | 289,699 | 0.87          | 0.88 | 18.0                            | 18.1 |  |
| Ibuprofen vs Paracetamol                  | PharMetrics Plus | 70,622                           | 461    | 358    | 31,534            | 31,111  | 0.65          | 0.51 | 14.6                            | 11.5 |  |
| Ibuprofen vs Paracetamol                  | OpenClaims       | 535,642                          | 4,999  | 4,543  | 258,697           | 258,560 | 0.93          | 0.85 | 19.3                            | 17.6 |  |
| <b>ITT 6 months (Feb 2020 - Oct 2020)</b> |                  |                                  |        |        |                   |         |               |      |                                 |      |  |
| Ibuprofen vs COX-2i                       | PharMetrics Plus | 68,118                           | 2,031  | 1,875  | 30,782            | 30,946  | 2.98          | 2.75 | 66.0                            | 60.6 |  |
| Ibuprofen vs COX-2i                       | OpenClaims       | 465,534                          | 11,227 | 9,650  | 224,472           | 225,405 | 2.41          | 2.07 | 50.0                            | 42.8 |  |
| Ibuprofen vs ns-NSAIDs                    | PharMetrics Plus | 136,417                          | 4,214  | 4,328  | 61,266            | 61,417  | 3.09          | 3.17 | 68.8                            | 70.5 |  |
| Ibuprofen vs ns-NSAIDs                    | OpenClaims       | 1,012,319                        | 26,929 | 26,771 | 480,605           | 481,832 | 2.66          | 2.64 | 56.0                            | 55.6 |  |
| Ibuprofen vs Paracetamol                  | PharMetrics Plus | 136,221                          | 4,408  | 4,386  | 61,007            | 61,139  | 3.24          | 3.22 | 72.3                            | 71.7 |  |
| Ibuprofen vs Paracetamol                  | OpenClaims       | 991,235                          | 27,457 | 27,707 | 470,064           | 469,717 | 2.77          | 2.80 | 58.4                            | 59.0 |  |

<sup>1</sup>Ibuprofen and comparator cohorts are matched 1:1 on PS and are therefore the same size. Ibu – Ibuprofen, Comp - Comparator  
**Supplementary table 12 Incidence of hospitalization with COVID-19 in PS-matched Ibuprofen and comparator cohorts**

| Comparisons                               | Database         | Persons each cohort <sup>1</sup> | Cases |       | Follow up (years) |         | Incidence (%) |      | Incidence (per 1k person years) |      |
|-------------------------------------------|------------------|----------------------------------|-------|-------|-------------------|---------|---------------|------|---------------------------------|------|
|                                           |                  |                                  | Ibu   | Comp  | Ibu               | Comp    | Ibu           | Comp | Ibu                             | Comp |
| <b>On treatment (Nov 2019- Jan 2020)</b>  |                  |                                  |       |       |                   |         |               |      |                                 |      |
| Ibuprofen vs COX-2i                       | PharMetrics Plus | 39,572                           | 29    | 89    | 6,963             | 14,660  | 0.07          | 0.22 | 4.2                             | 6.1  |
| Ibuprofen vs COX-2i                       | OpenClaims       | 272,097                          | 446   | 961   | 63,317            | 139,848 | 0.16          | 0.35 | 7.0                             | 6.9  |
| Ibuprofen vs ns-NSAIDs                    | PharMetrics Plus | 69,723                           | 24    | 91    | 9,073             | 16,183  | 0.03          | 0.13 | 2.7                             | 5.6  |
| Ibuprofen vs ns-NSAIDs                    | OpenClaims       | 563,839                          | 561   | 1,171 | 99,526            | 169,551 | 0.10          | 0.21 | 5.6                             | 6.9  |
| Ibuprofen vs Paracetamol                  | PharMetrics Plus | 54,074                           | 18    | 82    | 6,854             | 10,565  | 0.03          | 0.15 | 2.6                             | 7.8  |
| Ibuprofen vs Paracetamol                  | OpenClaims       | 437,928                          | 386   | 1,274 | 72,392            | 143,803 | 0.09          | 0.29 | 5.3                             | 8.9  |
| <b>On treatment (Feb 2020 - Oct 2020)</b> |                  |                                  |       |       |                   |         |               |      |                                 |      |
| Ibuprofen vs COX-2i                       | PharMetrics Plus | 67,190                           | 112   | 211   | 10,979            | 22,153  | 0.17          | 0.31 | 10.2                            | 9.5  |
| Ibuprofen vs COX-2i                       | OpenClaims       | 457,280                          | 1,044 | 1,948 | 92,847            | 196,320 | 0.23          | 0.43 | 11.2                            | 9.9  |
| Ibuprofen vs ns-NSAIDs                    | PharMetrics Plus | 120,954                          | 128   | 262   | 14,506            | 25,020  | 0.11          | 0.22 | 8.8                             | 10.5 |
| Ibuprofen vs ns-NSAIDs                    | OpenClaims       | 943,006                          | 1,456 | 2,432 | 144,396           | 244,609 | 0.15          | 0.26 | 10.1                            | 9.9  |
| Ibuprofen vs Paracetamol                  | PharMetrics Plus | 101,635                          | 120   | 185   | 11,687            | 16,004  | 0.12          | 0.18 | 10.3                            | 11.6 |
| Ibuprofen vs Paracetamol                  | OpenClaims       | 776,963                          | 1,143 | 2,228 | 110,941           | 191,379 | 0.15          | 0.29 | 10.3                            | 11.6 |
| <b>ITT 6 months (Nov 2019- Jan 2020)</b>  |                  |                                  |       |       |                   |         |               |      |                                 |      |
| Ibuprofen vs COX-2i                       | PharMetrics Plus | 40,040                           | 54    | 55    | 17,947            | 17,880  | 0.13          | 0.14 | 3.0                             | 3.1  |
| Ibuprofen vs COX-2i                       | OpenClaims       | 276,702                          | 707   | 592   | 135,081           | 135,347 | 0.26          | 0.21 | 5.2                             | 4.4  |
| Ibuprofen vs ns-NSAIDs                    | PharMetrics Plus | 76,940                           | 109   | 104   | 34,432            | 34,263  | 0.14          | 0.14 | 3.2                             | 3.0  |
| Ibuprofen vs ns-NSAIDs                    | OpenClaims       | 598,264                          | 1,492 | 1,504 | 289,591           | 290,180 | 0.25          | 0.25 | 5.2                             | 5.2  |
| Ibuprofen vs Paracetamol                  | PharMetrics Plus | 70,622                           | 97    | 82    | 31,576            | 31,144  | 0.14          | 0.12 | 3.1                             | 2.6  |
| Ibuprofen vs Paracetamol                  | OpenClaims       | 535,642                          | 1,421 | 1,382 | 259,150           | 258,952 | 0.27          | 0.26 | 5.5                             | 5.3  |
| <b>ITT 6 months (Feb 2020 - Oct 2020)</b> |                  |                                  |       |       |                   |         |               |      |                                 |      |
| Ibuprofen vs COX-2i                       | PharMetrics Plus | 68,118                           | 382   | 280   | 31,108            | 31,248  | 0.56          | 0.41 | 12.3                            | 9.0  |
| Ibuprofen vs COX-2i                       | OpenClaims       | 465,534                          | 2,969 | 2,385 | 226,202           | 226,903 | 0.64          | 0.51 | 13.1                            | 10.5 |
| Ibuprofen vs ns-NSAIDs                    | PharMetrics Plus | 136,417                          | 633   | 670   | 61,979            | 62,136  | 0.46          | 0.49 | 10.2                            | 10.8 |
| Ibuprofen vs ns-NSAIDs                    | OpenClaims       | 1,012,319                        | 5,868 | 5,902 | 485,097           | 486,264 | 0.58          | 0.58 | 12.1                            | 12.1 |
| Ibuprofen vs Paracetamol                  | PharMetrics Plus | 136,221                          | 684   | 632   | 61,741            | 61,853  | 0.50          | 0.46 | 11.1                            | 10.2 |
| Ibuprofen vs Paracetamol                  | OpenClaims       | 991,235                          | 5,823 | 6,202 | 474,662           | 474,421 | 0.59          | 0.63 | 12.3                            | 13.1 |

<sup>1</sup>Ibuprofen and comparator cohorts are matched 1:1 on PS and are therefore the same size. Ibu – Ibuprofen, Comp - Comparator

**Supplementary table 13. NCO effect estimate summary for Ibuprofen comparisons**

| Comparisons                               | Database         | Total NCOs (n) | Significant NCOs (n) | Significant NCOs before calibration (%) | Significant NCOs after calibration (%) |
|-------------------------------------------|------------------|----------------|----------------------|-----------------------------------------|----------------------------------------|
| <b>On treatment (Nov 2019- Jan 2020)</b>  |                  |                |                      |                                         |                                        |
| Ibuprofen vs COX-2i                       | OpenClaims       | 125            | 20                   | 16                                      | 4.8                                    |
| Ibuprofen vs COX-2i                       | PharMetrics Plus | 95             | 9                    | 9.5                                     | 3.2                                    |
| Ibuprofen vs ns-NSAIDs                    | OpenClaims       | 133            | 17                   | 12.8                                    | 2.3                                    |
| Ibuprofen vs ns-NSAIDs                    | PharMetrics Plus | 97             | 9                    | 9.3                                     | 6.2                                    |
| Ibuprofen vs Paracetamol                  | OpenClaims       | 131            | 32                   | 24.4                                    | 4.6                                    |
| Ibuprofen vs Paracetamol                  | PharMetrics Plus | 90             | 10                   | 11.1                                    | 2.2                                    |
| <b>On treatment (Feb 2020 - Oct 2020)</b> |                  |                |                      |                                         |                                        |
| Ibuprofen vs COX-2i                       | OpenClaims       | 130            | 33                   | 25.4                                    | 6.2                                    |
| Ibuprofen vs COX-2i                       | PharMetrics Plus | 103            | 18                   | 17.5                                    | 4.9                                    |
| Ibuprofen vs ns-NSAIDs                    | OpenClaims       | 140            | 21                   | 15                                      | 5.0                                    |
| Ibuprofen vs ns-NSAIDs                    | PharMetrics Plus | 110            | 14                   | 12.7                                    | 3.6                                    |
| Ibuprofen vs Paracetamol                  | OpenClaims       | 136            | 48                   | 35.3                                    | 4.4                                    |
| Ibuprofen vs Paracetamol                  | PharMetrics Plus | 104            | 33                   | 31.7                                    | 2.9                                    |
| <b>ITT 6 months (Nov 2019- Jan 2020)</b>  |                  |                |                      |                                         |                                        |
| Ibuprofen vs COX-2i                       | OpenClaims       | 140            | 27                   | 19.3                                    | 3.6                                    |
| Ibuprofen vs COX-2i                       | PharMetrics Plus | 117            | 9                    | 7.7                                     | 1.7                                    |
| Ibuprofen vs ns-NSAIDs                    | OpenClaims       | 145            | 26                   | 17.9                                    | 7.6                                    |
| Ibuprofen vs ns-NSAIDs                    | PharMetrics Plus | 124            | 11                   | 8.9                                     | 4.8                                    |
| Ibuprofen vs Paracetamol                  | OpenClaims       | 147            | 47                   | 32                                      | 6.8                                    |
| Ibuprofen vs Paracetamol                  | PharMetrics Plus | 127            | 17                   | 13.4                                    | 7.1                                    |
| <b>ITT 6 months (Feb 2020 - Oct 2020)</b> |                  |                |                      |                                         |                                        |
| Ibuprofen vs COX-2i                       | OpenClaims       | 141            | 43                   | 30.5                                    | 7.8                                    |
| Ibuprofen vs COX-2i                       | PharMetrics Plus | 119            | 12                   | 10.1                                    | 2.5                                    |
| Ibuprofen vs ns-NSAIDs                    | OpenClaims       | 154            | 37                   | 24                                      | 3.2                                    |
| Ibuprofen vs ns-NSAIDs                    | PharMetrics Plus | 134            | 8                    | 6                                       | 5.2                                    |
| Ibuprofen vs Paracetamol                  | OpenClaims       | 151            | 58                   | 38.4                                    | 5.3                                    |
| Ibuprofen vs Paracetamol                  | PharMetrics Plus | 137            | 28                   | 20.4                                    | 5.8                                    |

NCO – Negative control outcome.

Red - comparisons that were not completely calibrated (<5% NCOs)

**Supplementary table 14. Calibrated HRs for COVID-19 outcomes in Ibuprofen users versus other analgesic users in ITT analysis**

| Comparisons             | Database         | <u>COVID-19 diagnosis HR (95% CI)</u> |                     | <u>Hospitalization with COVID-19 HR (95% CI)</u> |                     |
|-------------------------|------------------|---------------------------------------|---------------------|--------------------------------------------------|---------------------|
|                         |                  | Nov 2019 - Jan 2020                   | Feb 2020 - Oct 2020 | Nov 2019 - Jan 2020                              | Feb 2020 - Oct 2020 |
| <b>ITT 6 months</b>     |                  |                                       |                     |                                                  |                     |
| Ibuprofen - COX-2i      | Open Claims      | 1.10 (0.95 - 1.28)                    | 1.09 (0.92 - 1.30)  | 1.12 (0.94 - 1.34)                               | 1.17 (0.98 - 1.40)  |
| Ibuprofen - COX-2i      | PharMetrics Plus | 1.14 (0.90 - 1.43)                    | 1.06 (0.91 - 1.23)  | 1.06 (0.69 - 1.61)                               | 1.37 (1.11 - 1.68)  |
| Ibuprofen - COX-2i      | Meta-analysis    | 1.11 (0.98 - 1.26)                    | 1.08 (0.96 - 1.20)  | 1.11 (0.95 - 1.31)                               | 1.25 (1.07 - 1.46)  |
| Ibuprofen - ns-NSAIDs   | Open Claims      | 1.00 (0.91 - 1.10)                    | 1.04 (0.93 - 1.15)  | 1.01 (0.90 - 1.13)                               | 1.02 (0.92 - 1.14)  |
| Ibuprofen - ns-NSAIDs   | PharMetrics Plus | 1.08 (0.94 - 1.25)                    | 1.03 (0.98 - 1.08)  | 1.06 (0.79 - 1.42)                               | 0.99 (0.88 - 1.11)  |
| Ibuprofen - ns-NSAIDs   | Meta-analysis    | 1.02 (0.94 - 1.11)                    | 1.03 (0.99 - 1.08)  | 1.02 (0.91 - 1.13)                               | 1.01 (0.93 - 1.09)  |
| Ibuprofen - Paracetamol | Open Claims      | 1.22 (0.90 - 1.67)                    | 1.13 (0.77 - 1.67)  | 1.14 (0.83 - 1.57)                               | 1.07 (0.73 - 1.59)  |
| Ibuprofen - Paracetamol | PharMetrics Plus | 1.29 (1.04 - 1.61)                    | 1.09 (0.87 - 1.37)  | 1.20 (0.84 - 1.70)                               | 1.15 (0.90 - 1.48)  |
| Ibuprofen - Paracetamol | Meta-analysis    | 1.27 (1.06 - 1.52)                    | 1.10 (0.90 - 1.34)  | 1.17 (0.92 - 1.48)                               | 1.13 (0.92 - 1.39)  |

**Supplementary figure 1. Calibrated HRs for COVID-19 outcomes in Ibuprofen users versus other analgesic users in ITT analysis**

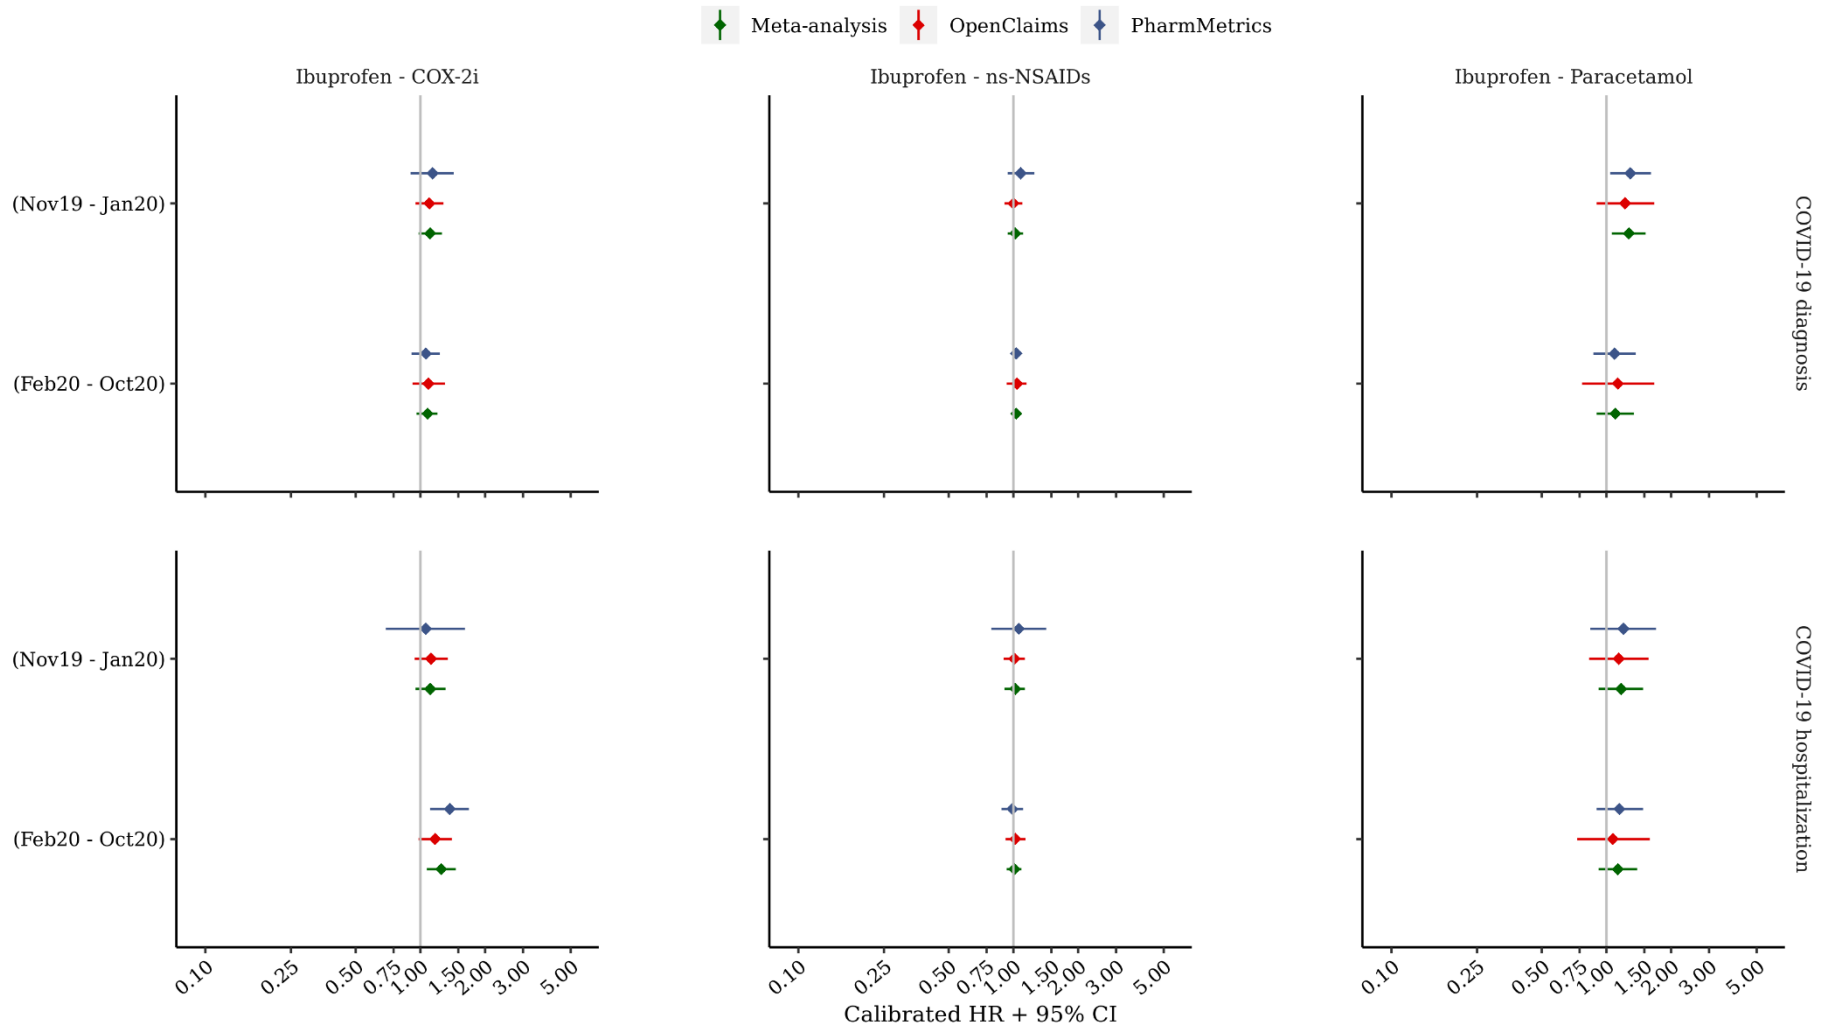



**Supplementary table 15. On-treatment time at risk of COVID-19 diagnosis in PS-matched cohorts**

|                                       |                  | <b>Time at risk distribution (days)</b> |            |            |               |            |            |            |
|---------------------------------------|------------------|-----------------------------------------|------------|------------|---------------|------------|------------|------------|
| <b>Cohort</b>                         | <b>Database</b>  | <b>Min</b>                              | <b>P10</b> | <b>P25</b> | <b>Median</b> | <b>P75</b> | <b>P90</b> | <b>Max</b> |
| <b>(November 2019 – January 2020)</b> |                  |                                         |            |            |               |            |            |            |
| Ibuprofen                             | OpenClaims       | 2                                       | 6          | 9          | 29            | 156        | 250        | 758        |
| COX-2i                                | OpenClaims       | 2                                       | 29         | 29         | 89            | 486        | 607        | 762        |
| Ibuprofen                             | PharMetrics Plus | 2                                       | 6          | 9          | 29            | 106        | 181        | 541        |
| COX-2i                                | PharMetrics Plus | 2                                       | 22         | 29         | 58            | 353        | 429        | 587        |
| Ibuprofen                             | OpenClaims       | 2                                       | 5          | 9          | 29            | 94         | 173        | 759        |
| ns-NSAID                              | OpenClaims       | 2                                       | 9          | 19         | 29            | 231        | 362        | 762        |
| Ibuprofen                             | PharMetrics Plus | 2                                       | 4          | 9          | 21            | 82         | 112        | 589        |
| ns-NSAID                              | PharMetrics Plus | 2                                       | 7          | 14         | 29            | 181        | 289        | 600        |
| Ibuprofen                             | OpenClaims       | 2                                       | 5          | 9          | 29            | 89         | 154        | 752        |
| Paracetamol                           | OpenClaims       | 1                                       | 2          | 4          | 13            | 380        | 594        | 753        |
| Ibuprofen                             | PharMetrics Plus | 2                                       | 5          | 9          | 21            | 78         | 105        | 534        |
| Paracetamol                           | PharMetrics Plus | 2                                       | 2          | 3          | 6             | 185        | 353        | 590        |
| <b>(February 2020 – October 2020)</b> |                  |                                         |            |            |               |            |            |            |
| Ibuprofen                             | OpenClaims       | 1                                       | 6          | 9          | 29            | 126        | 195        | 708        |
| COX-2i                                | OpenClaims       | 1                                       | 29         | 29         | 86            | 365        | 488        | 723        |
| Ibuprofen                             | PharMetrics Plus | 1                                       | 6          | 9          | 29            | 108        | 166        | 506        |
| COX-2i                                | PharMetrics Plus | 1                                       | 29         | 29         | 71            | 266        | 333        | 513        |
| Ibuprofen                             | OpenClaims       | 1                                       | 4          | 9          | 21            | 89         | 139        | 684        |
| ns-NSAID                              | OpenClaims       | 1                                       | 6          | 14         | 29            | 180        | 280        | 702        |
| Ibuprofen                             | PharMetrics Plus | 1                                       | 4          | 9          | 19            | 81         | 107        | 509        |
| ns-NSAID                              | PharMetrics Plus | 1                                       | 6          | 14         | 29            | 160        | 223        | 515        |
| Ibuprofen                             | OpenClaims       | 1                                       | 4          | 9          | 21            | 89         | 122        | 732        |
| Paracetamol                           | OpenClaims       | 1                                       | 2          | 4          | 9             | 197        | 402        | 775        |
| Ibuprofen                             | PharMetrics Plus | 1                                       | 4          | 9          | 19            | 75         | 96         | 509        |
| Paracetamol                           | PharMetrics Plus | 1                                       | 2          | 3          | 6             | 124        | 243        | 515        |

**Supplementary table 16. On-treatment time at risk of hospitalization with COVID-19 in PS-matched cohorts**

|                                       |                  | <b>Time at risk distribution (days)</b> |            |            |               |            |            |            |
|---------------------------------------|------------------|-----------------------------------------|------------|------------|---------------|------------|------------|------------|
| <b>Cohort</b>                         | <b>Database</b>  | <b>Min</b>                              | <b>P10</b> | <b>P25</b> | <b>Median</b> | <b>P75</b> | <b>P90</b> | <b>Max</b> |
| <b>(November 2019 - January 2020)</b> |                  |                                         |            |            |               |            |            |            |
| Ibuprofen                             | OpenClaims       | 2                                       | 6          | 9          | 29            | 157        | 253        | 758        |
| COX-2i                                | OpenClaims       | 2                                       | 29         | 29         | 89            | 505        | 610        | 762        |
| Ibuprofen                             | PharMetrics Plus | 2                                       | 6          | 9          | 29            | 107        | 182        | 541        |
| COX-2i                                | PharMetrics Plus | 2                                       | 22         | 29         | 58            | 359        | 432        | 587        |
| Ibuprofen                             | OpenClaims       | 2                                       | 5          | 9          | 29            | 94         | 174        | 759        |
| ns-NSAIDs                             | OpenClaims       | 2                                       | 9          | 19         | 29            | 234        | 369        | 762        |
| Ibuprofen                             | PharMetrics Plus | 2                                       | 4          | 9          | 21            | 82         | 113        | 589        |
| ns-NSAIDs                             | PharMetrics Plus | 2                                       | 7          | 14         | 29            | 181        | 292        | 600        |
| Ibuprofen                             | OpenClaims       | 2                                       | 5          | 9          | 29            | 89         | 154        | 752        |
| Paracetamol                           | OpenClaims       | 2                                       | 2          | 4          | 13            | 398        | 596        | 753        |
| Ibuprofen                             | PharMetrics Plus | 2                                       | 5          | 9          | 21            | 78         | 105        | 534        |
| Paracetamol                           | PharMetrics Plus | 2                                       | 2          | 3          | 6             | 190        | 360        | 590        |
| <b>(February 2020 - October 2020)</b> |                  |                                         |            |            |               |            |            |            |
| Ibuprofen                             | OpenClaims       | 1                                       | 6          | 9          | 29            | 127        | 197        | 708        |
| COX-2i                                | OpenClaims       | 1                                       | 29         | 29         | 86            | 374        | 500        | 723        |
| Ibuprofen                             | PharMetrics Plus | 1                                       | 6          | 9          | 29            | 109        | 168        | 506        |
| COX-2i                                | PharMetrics Plus | 2                                       | 29         | 29         | 71            | 269        | 341        | 513        |
| Ibuprofen                             | OpenClaims       | 1                                       | 4          | 9          | 21            | 89         | 140        | 684        |
| ns-NSAIDs                             | OpenClaims       | 1                                       | 6          | 14         | 29            | 182        | 286        | 702        |
| Ibuprofen                             | PharMetrics Plus | 1                                       | 4          | 9          | 19            | 82         | 108        | 509        |
| ns-NSAIDs                             | PharMetrics Plus | 1                                       | 6          | 14         | 29            | 162        | 226        | 515        |
| Ibuprofen                             | OpenClaims       | 1                                       | 4          | 9          | 21            | 89         | 123        | 732        |
| Paracetamol                           | OpenClaims       | 1                                       | 2          | 4          | 9             | 203        | 421        | 775        |
| Ibuprofen                             | PharMetrics Plus | 1                                       | 4          | 9          | 19            | 76         | 97         | 509        |
| Paracetamol                           | PharMetrics Plus | 1                                       | 2          | 3          | 6             | 126        | 247        | 515        |
